# Supplementary material
Source: publisher figshare collection journal article supplement (https://acs.figshare.com/ndownloader/files/4030879)
Supplement: Supplementary file 1 [file 4030879]

# Facile Preparation of Monodisperse Carbon Spheres: Template-free Construction and Further Their Hydrogen Storage Properties

Jiafu Chen, Zhanlin Lang, Qun Xu,<sup>\*</sup> Bo Hu, Jianwei Fu, Zhimin Chen, Jianan Zhang

College of Materials Science and Engineering, Zhengzhou University, Zhengzhou, 450052,  
P.R.China

<sup>\*</sup> E-mail address: qunxu@zzu.edu.cn

## **1. Materials**

Analytically pure styrene (St), which was supplied by Kemiou Chemical Reagents Researching Center in Tianjin, was purified by distillation under reduced pressure in nitrogen atmosphere. Divinylbenzene (DVB-55), containing 55% of the para- and meta-divinyl isomers and 45% of para- and meta-ethylvinyl isomers, was purchased from Aldrich Chemical Co. Potassium persulfate (KPS) was purchased from Aijian Reactant Factory in Shanghai, and was used after recrystallization. Analytically pure tetrachloromethane ( $\text{CCl}_4$ ) was obtained from Chemical Reagent Factory in Luoyang. Analytically pure acetone was provided by Chemical Reagent Factory in Tianjin. Analytically pure anhydrous aluminum trichloride ( $\text{AlCl}_3$ ) was supplied by Damao Chemical Reagent Factory in Tianjin.

## **2. Recipes for the preparation of core-shell P(St-co-DVB) spheres with different DVB dosage**

**Table S1.** Recipes for the preparation of core-shell P(St-co-DVB) spheres with different DVB dosage

| Samples | KPS(g) | St(g) | DVB  |       |
|---------|--------|-------|------|-------|
|         |        |       | (g)  | (wt%) |
| SPSs-35 | 0.12   | 1.95  | 1.05 | 35    |
| SPSs-40 | 0.12   | 1.80  | 1.20 | 40    |

### 3. SEM photos of the SPSs and HPCs samples

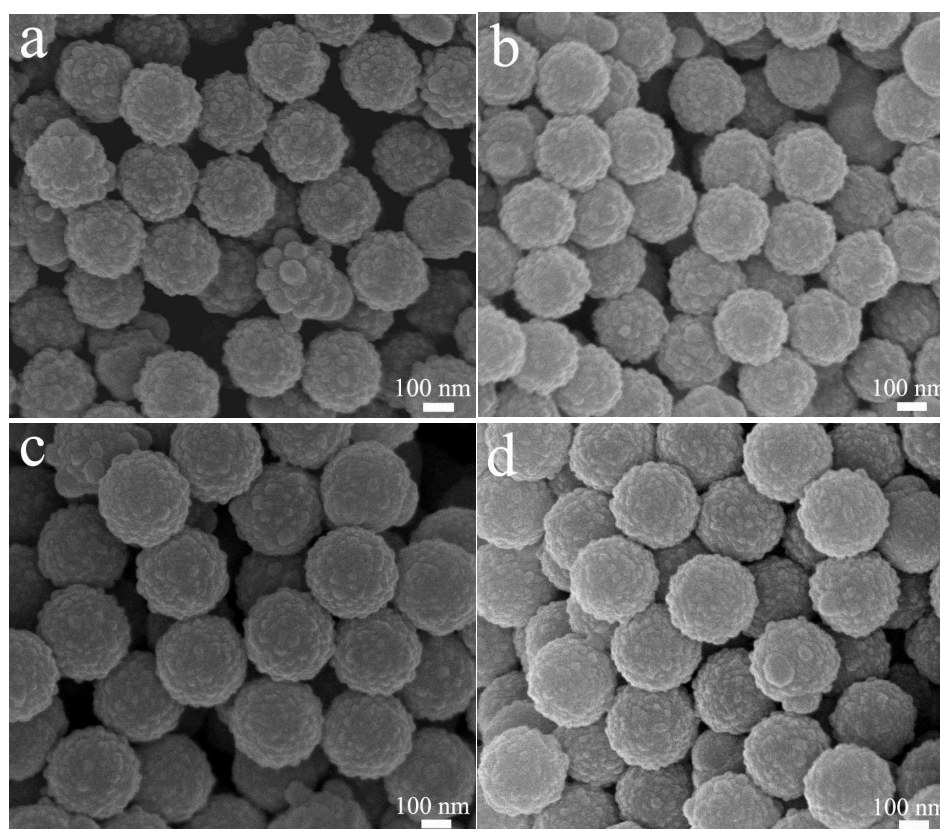

**Fig. S1.** SEM photos of (a) SPSs-35, (b) HPCs-35, (c) SPSs-40, and (d) HPCs-40.

SEM photos of the SPSs and HPCs samples are shown in Fig. S1. The diameter of the SPSs-35 and HPCs-35 was about 270 nm, and the diameter of the SPSs-40 and HPCs-40 was about 310 nm. According to Figure 4, the diameter of the CS35, CH35, CS40, and CH40 prepared from SPSs-35,

HPCs-35, SPSs-40 and HPCs-40 was respectively about 200 nm, 160 nm, 240 nm, and 220 nm. It is obvious that the size of carbon spheres is much smaller than that of the SPSs and HPCs.

#### 4. TEM photos of the s-HCPSs and h-HCPSs samples

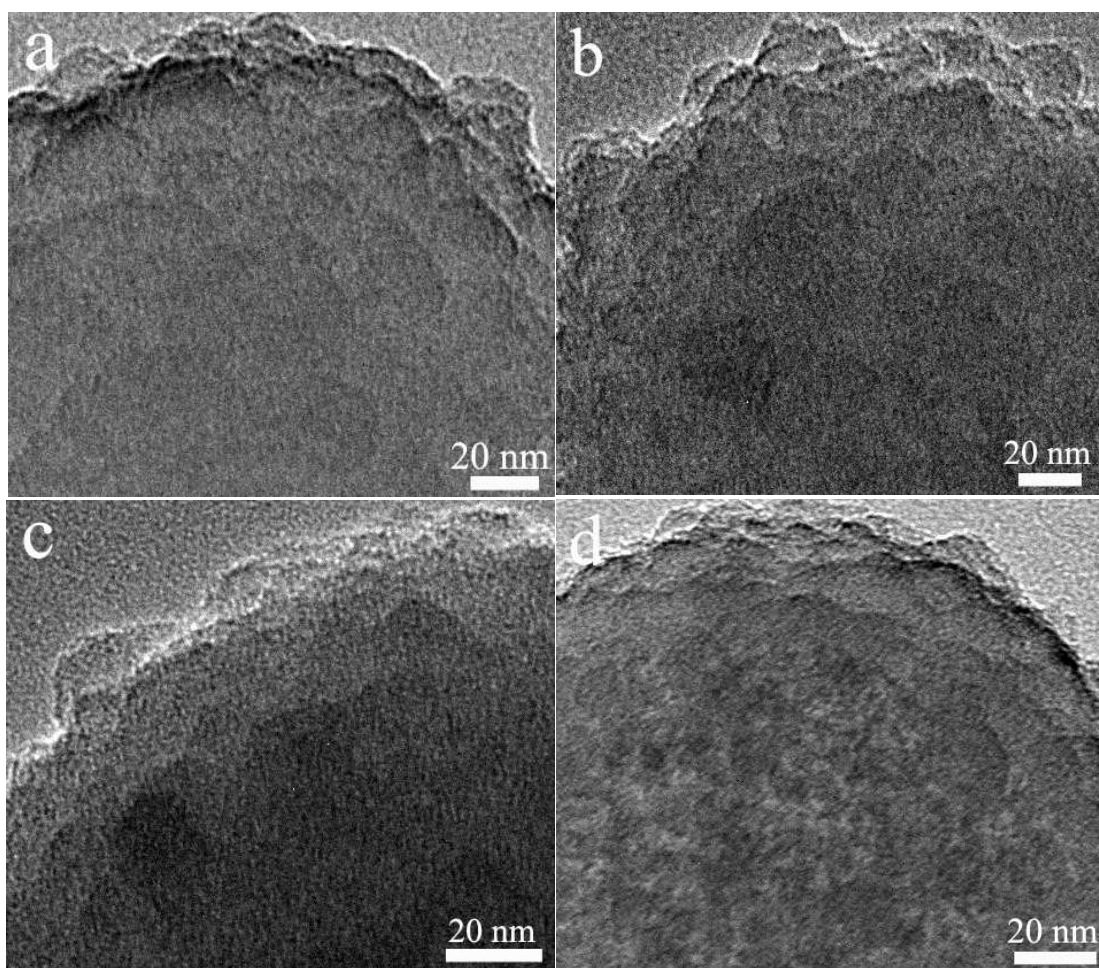

**Fig. S2.** TEM photos of (a) s-HCPSs-35, (b) h-HCPSs-35, (c) s-HCPSs-40, and (d) h-HCPSs-40

## 5. XRD patterns of the carbon spheres powder samples

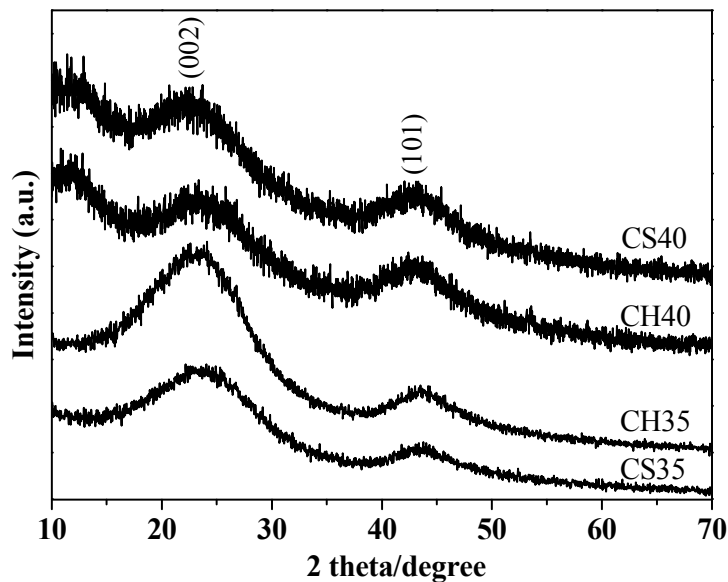

**Fig. S3** XRD patterns of the carbon spheres powder samples.

XRD patterns of the carbon spheres powder samples are shown in Fig. S2. The wide reflection peaks indicated that these carbon spheres were amorphous graphite phase. As a measure of the number of carbon sheets arranged as single layers, the empirical parameter ( $R$ ), which was defined as the ratio of height of the (002) Bragg peak to the background, was used.<sup>1</sup> Usually a larger  $R$  value indicates a higher degree of the graphitization.<sup>2,3</sup> The  $R$  values of CS35, CH35, CS40, and CH40 are respectively 1.9, 2.3, 1.4, and 1.4, showing different degree of the graphitization. Besides, the broad reflection peak at 12° might be related with the microporous structure in the matrix of carbon spheres (CS40 and CH40).

## 6. Raman spectra of the carbon spheres

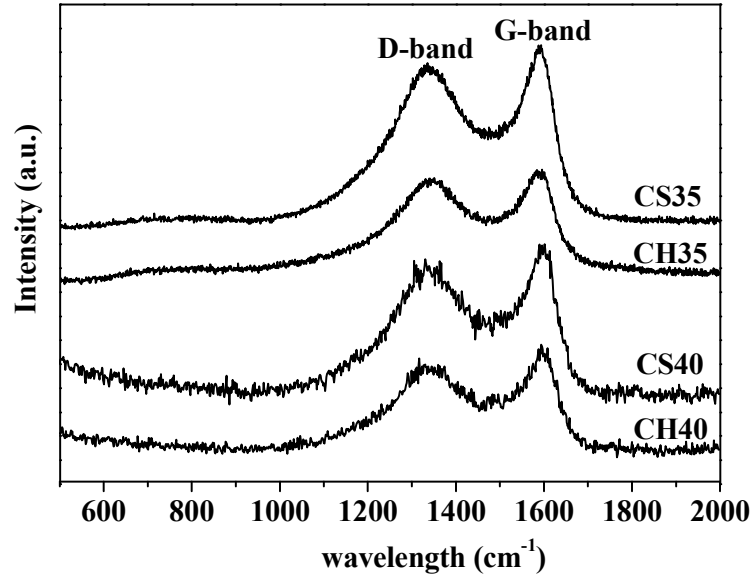

**Fig. S4.** Raman spectra of the carbon spheres.

Raman spectra for the carbon spheres samples are shown in Fig. S2. The D-band around 1350 cm<sup>-1</sup> is associated with the vibrations of carbon atoms with dangling bonds for the in-plane terminations of disordered graphite. The G-band around 1580 cm<sup>-1</sup> is attributed to an E<sub>2g</sub> mode of graphite and is related to the vibration of sp<sup>2</sup>-bonded carbon atoms in a two-dimensional hexagonal lattice, such as in a graphite layer. The low ratio of  $I_D/I_G$  is characteristic of a graphite lattice with perfect two-dimensional order in the graphitic layer.<sup>4</sup> The intensity ratio of  $I_D/I_G$  corresponding to CS35, CH35, CS40, and CH40 was respectively calculated to be 0.91, 0.95, 0.92, and 0.86.

## 7. Nitrogen adsorption/desorption isotherms of the carbon spheres

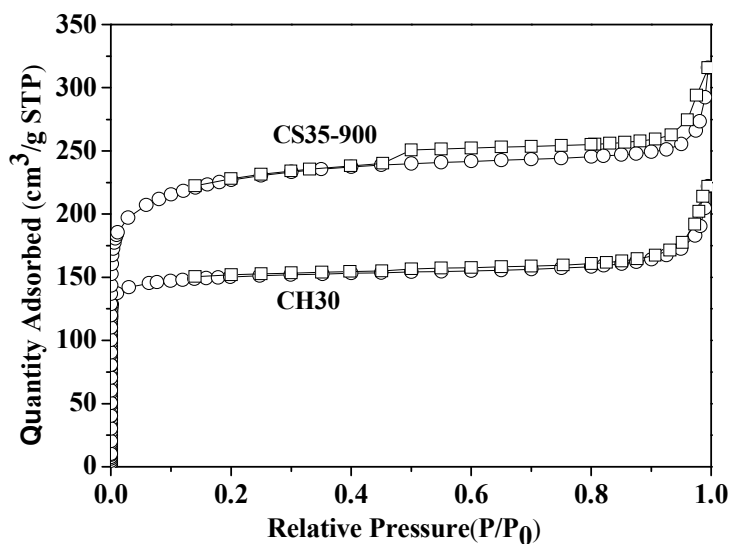

Fig. S5. Nitrogen adsorption/desorption isotherms of the carbon spheres

## 8. Textural parameters of the carbon spheres

Table S2. Textural parameters of the carbon spheres

| Samples  | $S_{\text{BET}}^{\text{a}}$<br>( $\text{m}^2/\text{g}$ ) | $V_{\text{t}}^{\text{b}}$<br>( $\text{m}^3/\text{g}$ ) | $V_{\text{micro}}^{\text{c}}$<br>( $\text{cm}^3/\text{g}$ ) | $V_{\text{micro}}/V_{\text{t}}$<br>(%) | $D_{\text{HK}}^{\text{d}}$<br>(nm) |
|----------|----------------------------------------------------------|--------------------------------------------------------|-------------------------------------------------------------|----------------------------------------|------------------------------------|
| CS35-900 | 776                                                      | 0.41                                                   | 0.32                                                        | 78                                     | 0.77                               |
| CH30     | 454                                                      | 0.34                                                   | 0.23                                                        | 68                                     | 0.49                               |

<sup>a</sup> Specific surface area (SSA) calculated by the Brunauer-Emmett-Teller (BET) method.

<sup>b</sup> Total pore volume.

<sup>c</sup> Microporous volume determined by the DR analysis.

<sup>d</sup> Median micropore size calculated by the HK method.

According to our previous report,<sup>5</sup> the shell thickness of hollow nanospherical precursor increases with increasing of DVB dosage. The textural parameters of the CH30, CH35 and CH40 samples respectively prepared from HPCs-30, HPCs-35 and HPCs-40 show that the shell thickness

influences the porosity of the carbon spheres (Tables 1 and S2). Besides, the carbon spheres labeled as CS35-900 were obtained by carbonizing s-HCPSs-35 at 900 °C. The N<sub>2</sub> adsorption-desorption results showed that the pore volume of CS35-900 was much larger than that of CS35 obtained by carbonizing s-HCPSs-35 at 700 °C (Tables 1 and S2). It was suggested that the pore volume was further increased after the carbonization temperature was increased to 900 °C.

## References

- [1] Liu Y, Xue JX., Zheng T, Dahn JR. Mechanism of lithium insertion in hard carbons prepared by pyrolysis of epoxy resins. *Carbon* 1996; 34(2):193-200.
- [2] Qu DY. Investigation of hydrogen physisorption active sites on the surface of porous carbonaceous materials. *Chem.-Eur. J.* 2008; 14:1040-6.
- [3] Wang HL, Gao QM, Hu J. High hydrogen storage capacity of porous carbons prepared by using activated carbon. *J Am Chem Soc* 2009; 131(20):7016-22.
- [4] Hradil J, Králová E. Styrene-divinylbenzene copolymers post-crosslinked with tetrachloromethane. *Polymer* 1998; 39(24):6041–8.
- [5] Li Y, Chen JF, Niu AP, Xue FF, Cao YX, Xu Q. Preparation of hollow poly(styrene-co-divinylbenzene) particles with variable cavity sizes and further fabrication of hollow TiO<sub>2</sub> particles using solid poly(styrene-co-divinylbenzene) particles as templates. *Colloids Surf. A* 2009; 342:107-14.
